# Supplementary material for: Evaluation of the Potential Use of Levan Polysaccharide in Paper Conservation
Source: Hindawi journal article supplement (doi:10.1155/2020/1416491), 2020-08-10
Supplement: f1 [file 1416491.f1.pdf]

## SUPPLEMENT 1

Table 1: Group and sample codes generated according to the use of sizing, ink, and adhesive material.

|          | 0           | 1                    | 2                  | 3             |
|----------|-------------|----------------------|--------------------|---------------|
| Sizing   | No sizing   | Egg W-<br>white-alum | Rice-gum<br>arabic |               |
| Ink      | No ink      | Iron gall            | Carbon Black       |               |
| Material | No material | 7% HL                | 10 %HL             | 10%<br>Starch |

  

| Sample codes  | Sizing |        |        | Ink  |      |      | Material |       |       |       | Group |     |
|---------------|--------|--------|--------|------|------|------|----------|-------|-------|-------|-------|-----|
|               | 0      | 1      | 2      | 0    | 1    | 2    | 0        | 1     | 2     | 3     |       |     |
| 0.0.0 (blank) | Orange |        |        | Blue |      |      | Green    |       |       |       |       | 0.0 |
| 0.0.1         | Orange |        |        | Blue |      |      |          | Green |       |       |       | 0.0 |
| 0.0.2         | Orange |        |        | Blue |      |      |          |       | Green |       |       | 0.0 |
| 0.0.3         | Orange |        |        | Blue |      |      |          |       |       | Green |       | 0.0 |
| 0.1.0         | Orange |        |        |      | Blue |      |          | Green |       |       |       | 0.1 |
| 0.1.1         | Orange |        |        |      | Blue |      |          |       | Green |       |       | 0.1 |
| 0.1.2         | Orange |        |        |      | Blue |      |          |       |       | Green |       | 0.1 |
| 0.1.3         | Orange |        |        |      | Blue |      |          |       |       |       | Green | 0.1 |
| 0.2.0         | Orange |        |        |      |      | Blue |          | Green |       |       |       | 0.2 |
| 0.2.1         | Orange |        |        |      |      | Blue |          |       | Green |       |       | 0.2 |
| 0.2.2         | Orange |        |        |      |      | Blue |          |       |       | Green |       | 0.2 |
| 0.2.3         | Orange |        |        |      |      | Blue |          |       |       |       | Green | 0.2 |
| 1.0.0         |        | Orange |        | Blue |      |      |          | Green |       |       |       | 1.0 |
| 1.0.1         |        | Orange |        | Blue |      |      |          |       | Green |       |       | 1.0 |
| 1.0.2         |        | Orange |        | Blue |      |      |          |       |       | Green |       | 1.0 |
| 1.0.3         |        | Orange |        | Blue |      |      |          |       |       |       | Green | 1.0 |
| 1.1.0         |        | Orange |        |      | Blue |      |          | Green |       |       |       | 1.1 |
| 1.1.1         |        | Orange |        |      | Blue |      |          |       | Green |       |       | 1.1 |
| 1.1.2         |        | Orange |        |      | Blue |      |          |       |       | Green |       | 1.1 |
| 1.1.3         |        | Orange |        |      | Blue |      |          |       |       |       | Green | 1.1 |
| 1.2.0         |        | Orange |        |      |      | Blue |          | Green |       |       |       | 1.2 |
| 1.2.1         |        | Orange |        |      |      | Blue |          |       | Green |       |       | 1.2 |
| 1.2.2         |        | Orange |        |      |      | Blue |          |       |       | Green |       | 1.2 |
| 1.2.3         |        | Orange |        |      |      | Blue |          |       |       |       | Green | 1.2 |
| 2.0.0         |        |        | Orange | Blue |      |      |          | Green |       |       |       | 2.0 |
| 2.0.1         |        |        | Orange | Blue |      |      |          |       | Green |       |       | 2.0 |
| 2.0.2         |        |        | Orange | Blue |      |      |          |       |       | Green |       | 2.0 |
| 2.0.3         |        |        | Orange | Blue |      |      |          |       |       |       | Green | 2.0 |
| 2.1.0         |        |        | Orange |      | Blue |      |          | Green |       |       |       | 2.1 |
| 2.1.1         |        |        | Orange |      | Blue |      |          |       | Green |       |       | 2.1 |
| 2.1.2         |        |        | Orange |      | Blue |      |          |       |       | Green |       | 2.1 |
| 2.1.3         |        |        | Orange |      | Blue |      |          |       |       |       | Green | 2.1 |
| 2.2.0         |        |        | Orange |      |      | Blue |          | Green |       |       |       | 2.2 |
| 2.2.1         |        |        | Orange |      |      | Blue |          |       | Green |       |       | 2.2 |
| 2.2.2         |        |        | Orange |      |      | Blue |          |       |       | Green |       | 2.2 |
| 2.2.3         |        |        | Orange |      |      | Blue |          |       |       |       | Green | 2.2 |
